# Supplementary material for: The scoring bias in reverse docking and the score normalization strategy to improve success rate of target fishing
Source: PubMed Central journal article supplement (PMC5308821; doi:10.1371/journal.pone.0171433), 2017-02-14
Supplement: pone.0171433.s001.pdf [file pone.0171433.s001.pdf]

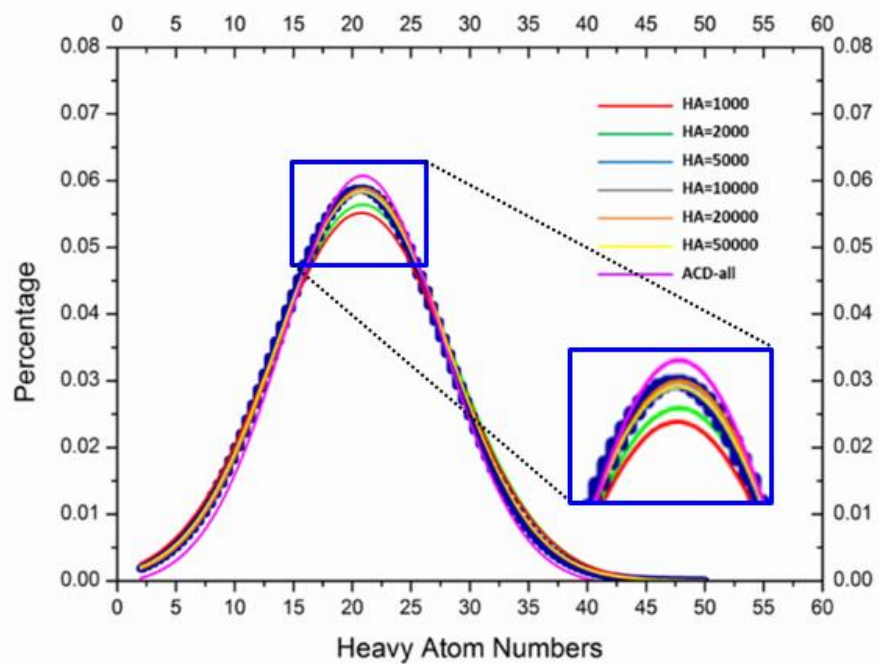

**S1 Fig.** The distribution of heavy atom number for ACD and different size of benchmark molecules.
