# Supplementary material for: The scoring bias in reverse docking and the score normalization strategy to improve success rate of target fishing
Source: PubMed Central journal article supplement (PMC5308821; doi:10.1371/journal.pone.0171433), 2017-02-14
Supplement: pone.0171433.s002.pdf [file pone.0171433.s002.pdf]

**S1 Table. The hit frequencies for all proteins of standard protein dataset before and after score normalization in the reverse docking by DOCK, Glide and AutoDock Vina.**

| Protein | Hit frequency <sup>a</sup> | Hit frequency <sup>b</sup> | Hit frequency <sup>c</sup> | Hit frequency <sup>d</sup> | Hit frequency <sup>e</sup> | Hit frequency <sup>f</sup> |
|---------|----------------------------|----------------------------|----------------------------|----------------------------|----------------------------|----------------------------|
| 1b9v    | 3                          | 3                          | 0                          | 21                         | 0                          | 47                         |
| 1bcd    | 1                          | 116                        | 0                          | 39                         | 5                          | 74                         |
| 1c8k    | 59                         | 140                        | 0                          | 25                         | 0                          | 0                          |
| 1d3g    | 66                         | 14                         | 326                        | 31                         | 1267                       | 1                          |
| 1e66    | 26                         | 254                        | 209                        | 37                         | 1102                       | 32                         |
| 1h00    | 10                         | 29                         | 0                          | 34                         | 3                          | 10                         |
| 1j4h    | 0                          | 27                         | 0                          | 71                         | 0                          | 0                          |
| 1kvo    | 22                         | 24                         | 0                          | 26                         | 3                          | 14                         |
| 1l2s    | 1                          | 62                         | 1                          | 71                         | 0                          | 52                         |
| 1li4    | 27                         | 124                        | 6                          | 65                         | 37                         | 22                         |
| 1lru    | 46                         | 92                         | 8                          | 110                        | 0                          | 48                         |
| 1mv9    | 1                          | 15                         | 261                        | 34                         | 26                         | 6                          |
| 1njs    | 5                          | 45                         | 84                         | 41                         | 0                          | 116                        |
| 1q4x    | 4                          | 9                          | 342                        | 18                         | 110                        | 4                          |
| 1qw6    | 438                        | 58                         | 0                          | 53                         | 460                        | 31                         |
| 1r9o    | 13                         | 2                          | 0                          | 77                         | 0                          | 36                         |
| 1s3b    | 67                         | 3                          | 395                        | 77                         | 402                        | 2                          |
| 1sj0    | 0                          | 6                          | 11                         | 19                         | 4                          | 80                         |
| 1sqt    | 4                          | 4                          | 1                          | 6                          | 0                          | 33                         |
| 1syn    | 18                         | 33                         | 11                         | 12                         | 11                         | 7                          |
| 1udt    | 937                        | 94                         | 55                         | 53                         | 79                         | 11                         |
| 1uyg    | 0                          | 0                          | 113                        | 15                         | 8                          | 43                         |
| 1vso    | 3                          | 27                         | 0                          | 29                         | 0                          | 19                         |
| 1xl2    | 26                         | 35                         | 0                          | 17                         | 1                          | 15                         |
| 1ype    | 3                          | 31                         | 1                          | 30                         | 0                          | 20                         |
| 1zw5    | 1607                       | 52                         | 1                          | 94                         | 6                          | 75                         |
| 2aa2    | 1                          | 279                        | 16                         | 19                         | 1                          | 399                        |
| 2am9    | 2                          | 83                         | 16                         | 14                         | 3                          | 162                        |
| 2ayw    | 1                          | 7                          | 5                          | 29                         | 0                          | 48                         |
| 2azr    | 0                          | 60                         | 0                          | 92                         | 3                          | 157                        |
| 2b8t    | 2                          | 35                         | 18                         | 55                         | 0                          | 86                         |
| 2cnk    | 0                          | 41                         | 0                          | 70                         | 0                          | 32                         |
| 2e1w    | 39                         | 50                         | 0                          | 35                         | 0                          | 0                          |
| 2etr    | 8                          | 38                         | 1                          | 15                         | 0                          | 7                          |
| 2fsz    | 1                          | 51                         | 6                          | 28                         | 1                          | 89                         |
| 2gtk    | 1                          | 11                         | 138                        | 48                         | 0                          | 44                         |
| 2h7l    | 39                         | 26                         | 56                         | 36                         | 5                          | 13                         |
| 2hv5    | 6                          | 3                          | 316                        | 14                         | 291                        | 50                         |
| 2hzi    | 13                         | 165                        | 266                        | 33                         | 112                        | 50                         |
| 2i0e    | 2                          | 18                         | 0                          | 31                         | 1                          | 28                         |
| 2i78    | 1                          | 22                         | 0                          | 31                         | 5                          | 21                         |
| 2ica    | 0                          | 2                          | 6                          | 54                         | 0                          | 109                        |
| 2nnq    | 12                         | 181                        | 1                          | 25                         | 10                         | 23                         |

|      |     |     |     |     |     |     |
|------|-----|-----|-----|-----|-----|-----|
| 2of2 | 1   | 32  | 1   | 26  | 0   | 8   |
| 2oi0 | 121 | 39  | 9   | 85  | 0   | 0   |
| 2oj9 | 1   | 28  | 2   | 18  | 0   | 50  |
| 2ojg | 10  | 36  | 8   | 29  | 0   | 12  |
| 2owb | 8   | 27  | 8   | 32  | 1   | 4   |
| 2p2i | 7   | 28  | 226 | 89  | 6   | 25  |
| 2p54 | 2   | 3   | 33  | 12  | 0   | 12  |
| 2qd9 | 0   | 43  | 8   | 91  | 0   | 20  |
| 2rgp | 26  | 64  | 7   | 43  | 2   | 11  |
| 2v3f | 4   | 54  | 0   | 52  | 3   | 30  |
| 2vt4 | 36  | 29  | 11  | 31  | 64  | 5   |
| 2zdt | 7   | 37  | 74  | 25  | 0   | 16  |
| 2zec | 1   | 46  | 0   | 7   | 0   | 44  |
| 2znp | 1   | 5   | 78  | 50  | 0   | 0   |
| 3bgs | 1   | 31  | 24  | 152 | 0   | 35  |
| 3biz | 2   | 34  | 5   | 18  | 7   | 49  |
| 3bkl | 36  | 25  | 2   | 40  | 7   | 17  |
| 3bqd | 5   | 334 | 103 | 47  | 0   | 2   |
| 3bwm | 1   | 223 | 4   | 47  | 4   | 518 |
| 3bz3 | 1   | 47  | 13  | 47  | 0   | 29  |
| 3c4f | 2   | 98  | 22  | 15  | 9   | 134 |
| 3ccw | 6   | 68  | 0   | 45  | 0   | 47  |
| 3chp | 52  | 1   | 211 | 74  | 607 | 132 |
| 3cjo | 4   | 25  | 0   | 57  | 0   | 0   |
| 3cqw | 30  | 14  | 0   | 44  | 4   | 14  |
| 3d0e | 5   | 1   | 0   | 48  | 0   | 8   |
| 3d4q | 4   | 42  | 58  | 13  | 19  | 8   |
| 3e37 | 2   | 22  | 13  | 70  | 0   | 22  |
| 3el8 | 2   | 78  | 0   | 26  | 0   | 8   |
| 3eml | 2   | 47  | 26  | 28  | 11  | 28  |
| 3eqh | 391 | 38  | 27  | 56  | 0   | 7   |
| 3f07 | 0   | 190 | 46  | 602 | 1   | 133 |
| 3f9m | 2   | 27  | 1   | 73  | 3   | 354 |
| 3frj | 94  | 4   | 7   | 27  | 7   | 11  |
| 3g0e | 2   | 80  | 28  | 20  | 0   | 79  |
| 3g6z | 0   | 18  | 4   | 16  | 0   | 6   |
| 3hl5 | 0   | 48  | 0   | 40  | 0   | 71  |
| 3hmm | 198 | 63  | 5   | 64  | 42  | 7   |
| 3kba | 0   | 108 | 74  | 18  | 3   | 3   |
| 3kgc | 1   | 60  | 31  | 22  | 0   | 63  |
| 3kl6 | 5   | 0   | 8   | 64  | 2   | 80  |
| 3krj | 2   | 4   | 35  | 40  | 11  | 45  |
| 3l3m | 130 | 55  | 38  | 32  | 31  | 11  |
| 3l5d | 2   | 29  | 0   | 21  | 0   | 0   |
| 3lan | 3   | 14  | 113 | 52  | 97  | 106 |
| 3ln1 | 3   | 52  | 82  | 31  | 23  | 36  |
| 3lpb | 7   | 6   | 4   | 19  | 0   | 0   |

|      |     |    |     |     |    |     |
|------|-----|----|-----|-----|----|-----|
| 3lq8 | 4   | 0  | 19  | 17  | 1  | 79  |
| 3m2w | 2   | 20 | 2   | 37  | 0  | 19  |
| 3max | 5   | 43 | 823 | 396 | 14 | 354 |
| 3nf7 | 0   | 48 | 0   | 19  | 0  | 33  |
| 3nxo | 38  | 29 | 2   | 23  | 27 | 6   |
| 3nxu | 22  | 0  | 15  | 55  | 6  | 14  |
| 3ny8 | 3   | 0  | 0   | 10  | 18 | 3   |
| 3odu | 22  | 33 | 0   | 10  | 0  | 14  |
| 3pbl | 4   | 3  | 1   | 64  | 6  | 21  |
| 830c | 142 | 73 | 0   | 58  | 8  | 41  |

<sup>a</sup>The hit frequency for DOCK before score normalization

<sup>b</sup>The hit frequency for DOCK after score normalization

<sup>c</sup>The hit frequency for Glide before score normalization

<sup>d</sup>The hit frequency for Glide after score normalization

<sup>e</sup>The hit frequency for AutoDock Vina before score normalization

<sup>f</sup>The hit frequency for AutoDock Vina after score normalization
