# Supplementary material for: The scoring bias in reverse docking and the score normalization strategy to improve success rate of target fishing
Source: PubMed Central journal article supplement (PMC5308821; doi:10.1371/journal.pone.0171433), 2017-02-14
Supplement: pone.0171433.s003.pdf [file pone.0171433.s003.pdf]

**S2 Table. All protein pocket properties of standard protein dataset.**

| Protein | Median_Contact_Area_DOCK | Median_Contact_Area_Glide | Median_Contact_Area_AutoDock_Vina | Size   | Volume | Exposure | Enclosure | Contact | Phobic | Philic | Balance | Don/Acc |
|---------|--------------------------|---------------------------|-----------------------------------|--------|--------|----------|-----------|---------|--------|--------|---------|---------|
| 1b9v    | 323.40                   | 332.69                    | 314.14                            | 88.00  | 243.87 | 0.46     | 0.82      | 1.02    | 0.50   | 1.32   | 0.38    | 1.24    |
| 1bcd    | 320.69                   | 313.44                    | 311.85                            | 34.00  | 51.79  | 0.35     | 0.97      | 1.46    | 0.00   | 2.12   | 0.00    | 0.35    |
| 1c8k    | 337.81                   | 336.82                    | 334.52                            | 54.00  | 153.32 | 0.52     | 0.77      | 1.09    | 1.00   | 0.97   | 1.04    | 0.23    |
| 1d3g    | 365.24                   | 378.74                    | 376.78                            | 207.00 | 341.63 | 0.34     | 0.89      | 1.16    | 2.67   | 0.57   | 4.68    | 0.81    |
| 1e66    | 352.57                   | 386.47                    | 363.58                            | 105.00 | 169.10 | 0.33     | 0.98      | 1.29    | 1.35   | 1.31   | 1.03    | 0.37    |
| 1h00    | 389.05                   | 285.00                    | 360.71                            | 136.00 | 357.06 | 0.41     | 0.85      | 1.11    | 1.94   | 0.75   | 2.59    | 1.12    |
| 1j4h    | 281.83                   | 291.81                    | 280.54                            | 46.00  | 158.81 | 0.69     | 0.67      | 0.74    | 1.30   | 0.53   | 2.45    | 0.62    |
| 1kvo    | 356.94                   | 361.26                    | 339.03                            | 123.00 | 287.09 | 0.37     | 0.78      | 1.04    | 1.29   | 1.03   | 1.25    | 1.32    |
| 1l2s    | 347.24                   | 324.50                    | 313.29                            | 124.00 | 422.23 | 0.48     | 0.84      | 1.11    | 0.46   | 1.45   | 0.32    | 0.34    |
| 1li4    | 354.12                   | 357.24                    | 357.33                            | 257.00 | 628.38 | 0.40     | 0.85      | 1.10    | 0.67   | 1.22   | 0.55    | 0.62    |
| 1lru    | 343.59                   | 340.42                    | 320.84                            | 106.00 | 279.89 | 0.39     | 0.80      | 1.09    | 0.90   | 1.43   | 0.63    | 0.60    |
| 1mv9    | 342.10                   | 391.99                    | 377.75                            | 194.00 | 245.59 | 0.22     | 0.97      | 1.22    | 4.65   | 0.40   | 11.63   | 0.32    |
| 1njs    | 343.64                   | 369.97                    | 350.64                            | 129.00 | 227.07 | 0.20     | 0.91      | 1.24    | 0.65   | 1.38   | 0.47    | 0.70    |
| 1q4x    | 337.79                   | 389.56                    | 373.11                            | 173.00 | 215.06 | 0.25     | 0.97      | 1.25    | 4.53   | 0.67   | 6.79    | 0.30    |
| 1qw6    | 390.17                   | 342.39                    | 366.92                            | 192.00 | 577.27 | 0.52     | 0.88      | 1.15    | 1.34   | 1.11   | 1.20    | 0.86    |
| 1r9o    | 390.06                   | 376.68                    | 306.42                            | 279.00 | 577.61 | 0.45     | 0.93      | 1.20    | 1.96   | 0.83   | 2.36    | 0.72    |
| 1s3b    | 359.62                   | 382.78                    | 370.79                            | 23.00  | 62.77  | 0.72     | 0.58      | 0.76    | 0.16   | 1.14   | 0.14    | 0.97    |
| 1sj0    | 344.64                   | 369.10                    | 351.30                            | 170.00 | 356.38 | 0.32     | 0.89      | 1.15    | 2.79   | 0.57   | 4.86    | 1.99    |
| 1sqt    | 312.46                   | 323.99                    | 300.25                            | 72.00  | 167.04 | 0.53     | 0.73      | 1.04    | 0.37   | 1.16   | 0.32    | 1.24    |
| 1syn    | 389.45                   | 368.34                    | 352.09                            | 185.00 | 608.14 | 0.49     | 0.80      | 0.98    | 0.51   | 1.09   | 0.47    | 0.62    |
| 1udt    | 387.66                   | 394.75                    | 364.73                            | 221.00 | 468.54 | 0.38     | 0.86      | 1.14    | 1.28   | 0.91   | 1.40    | 0.90    |
| 1uyg    | 361.35                   | 382.26                    | 352.45                            | 95.00  | 159.15 | 0.34     | 0.97      | 1.25    | 2.26   | 0.78   | 2.88    | 0.36    |
| 1vso    | 336.04                   | 323.10                    | 311.88                            | 84.00  | 264.80 | 0.35     | 0.85      | 1.02    | 0.73   | 1.52   | 0.48    | 0.41    |
| 1xl2    | 363.19                   | 355.14                    | 327.82                            | 176.00 | 528.22 | 0.38     | 0.78      | 0.96    | 1.21   | 0.79   | 1.53    | 1.07    |
| 1ype    | 342.67                   | 351.12                    | 331.52                            | 105.00 | 403.71 | 0.51     | 0.81      | 1.15    | 0.92   | 1.16   | 0.80    | 0.88    |
| 1zw5    | 362.58                   | 359.05                    | 368.47                            | 128.00 | 209.23 | 0.30     | 0.97      | 1.17    | 0.06   | 2.01   | 0.03    | 0.45    |
| 2aa2    | 295.11                   | 356.85                    | 356.47                            | 136.00 | 185.56 | 0.20     | 0.98      | 1.25    | 2.95   | 0.57   | 5.18    | 0.91    |
| 2am9    | 324.25                   | 347.17                    | 349.06                            | 125.00 | 166.70 | 0.21     | 0.98      | 1.25    | 4.35   | 0.32   | 13.78   | 2.02    |
| 2ayw    | 294.35                   | 294.97                    | 283.39                            | 93.00  | 370.78 | 0.66     | 0.66      | 0.85    | 0.33   | 0.90   | 0.37    | 1.12    |

---

|      |        |        |        |        |        |      |      |      |      |      |       |      |
|------|--------|--------|--------|--------|--------|------|------|------|------|------|-------|------|
| 2azr | 305.18 | 306.40 | 296.60 | 49.00  | 93.30  | 0.52 | 0.75 | 1.03 | 0.19 | 2.07 | 0.09  | 0.09 |
| 2b8t | 336.39 | 334.66 | 320.31 | 83.00  | 241.47 | 0.48 | 0.85 | 1.13 | 0.89 | 1.34 | 0.66  | 0.45 |
| 2cnk | 305.20 | 314.63 | 285.68 | 88.00  | 278.17 | 0.52 | 0.74 | 0.90 | 0.54 | 1.23 | 0.44  | 0.55 |
| 2e1w | 383.45 | 393.17 | 373.87 | 176.00 | 376.96 | 0.38 | 0.84 | 1.05 | 0.99 | 0.93 | 1.07  | 1.02 |
| 2etr | 347.35 | 350.63 | 327.00 | 143.00 | 449.67 | 0.53 | 0.75 | 0.94 | 1.03 | 0.85 | 1.22  | 1.39 |
| 2fsz | 318.94 | 351.31 | 338.85 | 141.00 | 217.12 | 0.27 | 0.91 | 1.17 | 3.75 | 0.34 | 11.19 | 3.91 |
| 2gtk | 361.66 | 385.99 | 366.02 | 198.00 | 370.44 | 0.36 | 0.85 | 1.05 | 2.15 | 0.67 | 3.22  | 0.54 |
| 2h7l | 370.01 | 352.90 | 340.09 | 206.00 | 577.61 | 0.43 | 0.91 | 1.19 | 1.72 | 0.94 | 1.84  | 0.52 |
| 2hv5 | 338.74 | 361.07 | 347.30 | 171.00 | 315.22 | 0.41 | 0.92 | 1.30 | 1.64 | 1.24 | 1.33  | 0.24 |
| 2hzi | 335.23 | 371.89 | 354.70 | 130.00 | 197.91 | 0.24 | 0.95 | 1.26 | 2.11 | 0.89 | 2.38  | 0.92 |
| 2i0e | 363.09 | 358.52 | 331.62 | 107.00 | 371.13 | 0.44 | 0.82 | 1.05 | 0.46 | 1.28 | 0.36  | 0.81 |
| 2i78 | 328.80 | 338.06 | 321.05 | 95.00  | 281.60 | 0.62 | 0.72 | 0.90 | 0.20 | 1.15 | 0.18  | 0.90 |
| 2ica | 337.11 | 345.62 | 327.93 | 88.00  | 264.11 | 0.28 | 0.89 | 1.16 | 4.45 | 0.28 | 16.14 | 0.21 |
| 2nnq | 339.46 | 371.10 | 335.99 | 136.00 | 325.51 | 0.25 | 0.95 | 1.14 | 2.18 | 0.78 | 2.78  | 0.50 |
| 2of2 | 354.36 | 359.62 | 336.04 | 71.00  | 315.22 | 0.54 | 0.79 | 0.99 | 0.90 | 0.95 | 0.94  | 2.07 |
| 2oi0 | 341.03 | 359.28 | 332.46 | 117.00 | 266.51 | 0.29 | 0.87 | 1.20 | 1.09 | 1.26 | 0.87  | 1.32 |
| 2oj9 | 360.50 | 367.71 | 354.67 | 104.00 | 215.40 | 0.44 | 0.81 | 1.03 | 1.31 | 0.71 | 1.85  | 1.07 |
| 2ojg | 367.33 | 383.61 | 357.24 | 140.00 | 275.43 | 0.37 | 0.85 | 1.13 | 0.85 | 1.22 | 0.69  | 1.05 |
| 2owb | 376.28 | 380.88 | 351.03 | 140.00 | 264.11 | 0.31 | 0.84 | 1.07 | 1.52 | 0.88 | 1.72  | 0.69 |
| 2p2i | 337.21 | 382.23 | 357.05 | 169.00 | 300.12 | 0.28 | 0.90 | 1.19 | 2.68 | 0.67 | 4.00  | 0.88 |
| 2p54 | 361.96 | 406.83 | 371.63 | 281.00 | 452.07 | 0.39 | 0.88 | 1.14 | 1.65 | 0.93 | 1.76  | 0.79 |
| 2qd9 | 342.71 | 359.16 | 343.76 | 95.00  | 223.29 | 0.33 | 0.87 | 1.20 | 2.74 | 0.74 | 3.71  | 0.34 |
| 2rgp | 375.47 | 385.74 | 362.82 | 199.00 | 365.64 | 0.31 | 0.85 | 1.13 | 1.86 | 0.85 | 2.20  | 0.58 |
| 2v3f | 332.03 | 337.24 | 317.20 | 75.00  | 109.42 | 0.24 | 0.98 | 1.18 | 0.29 | 1.58 | 0.18  | 0.37 |
| 2vt4 | 381.28 | 387.62 | 356.87 | 186.00 | 557.38 | 0.47 | 0.87 | 1.12 | 1.18 | 0.90 | 1.32  | 1.27 |
| 2zdt | 366.05 | 369.17 | 361.88 | 181.00 | 325.85 | 0.40 | 0.86 | 1.10 | 1.71 | 1.14 | 1.50  | 0.48 |
| 2zec | 301.33 | 307.69 | 287.32 | 55.00  | 187.62 | 0.65 | 0.73 | 0.93 | 0.37 | 1.02 | 0.37  | 1.73 |
| 2znp | 374.10 | 405.69 | 370.41 | 282.00 | 559.43 | 0.38 | 0.88 | 1.18 | 2.27 | 0.87 | 2.59  | 0.60 |
| 3bgs | 350.08 | 345.57 | 340.33 | 77.00  | 213.69 | 0.44 | 0.82 | 1.09 | 1.22 | 1.01 | 1.20  | 0.65 |
| 3biz | 357.61 | 362.72 | 338.84 | 115.00 | 265.14 | 0.40 | 0.79 | 1.05 | 0.60 | 0.96 | 0.63  | 0.57 |
| 3bkl | 374.15 | 359.21 | 345.21 | 205.00 | 633.18 | 0.37 | 0.90 | 1.09 | 0.53 | 1.54 | 0.34  | 0.35 |

---

---

|      |        |        |        |        |        |      |      |      |      |      |      |      |
|------|--------|--------|--------|--------|--------|------|------|------|------|------|------|------|
| 3bqd | 335.24 | 397.08 | 375.76 | 220.00 | 371.47 | 0.30 | 0.95 | 1.24 | 2.26 | 0.76 | 2.98 | 1.98 |
| 3bwm | 297.30 | 355.06 | 315.37 | 143.00 | 220.55 | 0.33 | 0.88 | 1.33 | 0.94 | 1.30 | 0.72 | 0.53 |
| 3bz3 | 355.73 | 370.81 | 349.98 | 141.00 | 281.95 | 0.25 | 0.87 | 1.15 | 1.32 | 0.91 | 1.45 | 1.31 |
| 3c4f | 327.89 | 359.87 | 352.83 | 109.00 | 136.86 | 0.28 | 0.95 | 1.23 | 2.97 | 0.91 | 3.28 | 0.43 |
| 3ccw | 359.14 | 353.80 | 328.92 | 107.00 | 362.89 | 0.53 | 0.78 | 1.03 | 1.03 | 1.06 | 0.97 | 0.35 |
| 3chp | 377.13 | 354.68 | 352.39 | 218.00 | 685.31 | 0.48 | 0.91 | 1.20 | 1.73 | 1.04 | 1.66 | 0.76 |
| 3cjo | 306.89 | 340.98 | 307.55 | 83.00  | 250.39 | 0.37 | 0.80 | 1.10 | 0.32 | 1.74 | 0.19 | 0.35 |
| 3cqw | 392.26 | 386.30 | 358.40 | 110.00 | 369.07 | 0.50 | 0.88 | 1.15 | 0.92 | 1.25 | 0.73 | 0.87 |
| 3d0e | 368.24 | 394.63 | 361.16 | 169.00 | 445.90 | 0.38 | 0.88 | 1.15 | 0.75 | 1.21 | 0.62 | 0.84 |
| 3d4q | 360.91 | 381.13 | 353.86 | 168.00 | 352.95 | 0.40 | 0.83 | 1.12 | 1.47 | 0.90 | 1.65 | 0.91 |
| 3e37 | 307.02 | 305.79 | 296.30 | 134.00 | 558.75 | 0.46 | 0.87 | 1.12 | 1.29 | 1.22 | 1.06 | 0.51 |
| 3e18 | 373.00 | 390.05 | 354.70 | 207.00 | 458.93 | 0.42 | 0.82 | 1.09 | 1.36 | 0.88 | 1.56 | 1.05 |
| 3eml | 373.98 | 397.77 | 365.00 | 103.00 | 231.18 | 0.29 | 0.90 | 1.17 | 1.94 | 0.79 | 2.45 | 0.44 |
| 3eqh | 375.82 | 383.22 | 352.89 | 303.00 | 778.27 | 0.41 | 0.87 | 1.16 | 1.53 | 1.02 | 1.50 | 0.58 |
| 3f07 | 287.28 | 304.67 | 280.34 | 49.00  | 132.74 | 0.60 | 0.82 | 1.20 | 0.97 | 1.15 | 0.84 | 0.39 |
| 3f9m | 317.35 | 302.59 | 307.35 | 38.00  | 51.11  | 0.33 | 0.99 | 1.59 | 0.70 | 1.39 | 0.50 | 0.22 |
| 3frj | 396.57 | 383.58 | 353.66 | 247.00 | 667.82 | 0.42 | 0.82 | 1.02 | 0.59 | 1.28 | 0.46 | 0.46 |
| 3g0e | 328.69 | 350.88 | 332.85 | 102.00 | 204.77 | 0.49 | 0.73 | 0.93 | 1.70 | 0.74 | 2.31 | 0.73 |
| 3g6z | 359.48 | 366.37 | 342.14 | 149.00 | 673.65 | 0.47 | 0.87 | 1.09 | 1.85 | 0.63 | 2.96 | 2.14 |
| 3hl5 | 246.58 | 262.47 | 245.31 | 30.00  | 69.63  | 0.59 | 0.63 | 0.90 | 0.17 | 1.04 | 0.16 | 0.88 |
| 3hmm | 380.31 | 358.22 | 361.40 | 130.00 | 222.95 | 0.30 | 0.89 | 1.17 | 1.53 | 0.89 | 1.73 | 0.62 |
| 3kba | 323.02 | 377.47 | 367.59 | 147.00 | 216.78 | 0.25 | 0.98 | 1.25 | 3.47 | 0.51 | 6.82 | 1.91 |
| 3kge | 277.56 | 221.00 | 259.49 | 37.00  | 54.19  | 0.36 | 1.00 | 1.59 | 0.00 | 2.63 | 0.00 | 0.18 |
| 3kl6 | 310.70 | 328.73 | 308.74 | 107.00 | 316.59 | 0.65 | 0.71 | 0.96 | 1.28 | 0.80 | 1.61 | 1.06 |
| 3krj | 333.80 | 345.26 | 333.35 | 114.00 | 237.70 | 0.45 | 0.81 | 1.09 | 1.33 | 0.85 | 1.56 | 1.38 |
| 3l3m | 372.58 | 361.14 | 335.52 | 211.00 | 563.89 | 0.41 | 0.88 | 1.14 | 1.09 | 1.10 | 1.00 | 0.87 |
| 3l5d | 312.29 | 322.44 | 310.25 | 19.00  | 90.55  | 0.76 | 0.69 | 0.84 | 0.59 | 0.81 | 0.73 | 2.63 |
| 3lan | 337.95 | 386.22 | 368.08 | 174.00 | 340.26 | 0.43 | 0.81 | 1.11 | 2.54 | 0.62 | 4.10 | 0.82 |
| 3ln1 | 308.96 | 371.31 | 357.33 | 134.00 | 200.65 | 0.31 | 0.95 | 1.23 | 4.29 | 0.60 | 7.18 | 0.83 |
| 3lpb | 379.92 | 379.34 | 368.25 | 132.00 | 254.16 | 0.25 | 0.87 | 1.10 | 1.80 | 0.76 | 2.36 | 0.52 |
| 3lq8 | 366.78 | 367.84 | 358.80 | 193.00 | 371.47 | 0.45 | 0.82 | 1.11 | 1.93 | 0.81 | 2.39 | 0.90 |

---

---

|      |        |        |        |        |        |      |      |      |      |      |      |      |
|------|--------|--------|--------|--------|--------|------|------|------|------|------|------|------|
| 3m2w | 352.32 | 353.40 | 334.28 | 135.00 | 249.70 | 0.31 | 0.81 | 1.00 | 1.34 | 0.82 | 1.64 | 1.09 |
| 3max | 273.03 | 306.94 | 278.83 | 85.00  | 147.15 | 0.42 | 0.88 | 1.34 | 3.21 | 0.96 | 3.35 | 0.45 |
| 3nf7 | 314.29 | 345.52 | 319.28 | 68.00  | 264.11 | 0.63 | 0.71 | 0.98 | 1.49 | 0.69 | 2.14 | 1.36 |
| 3nxo | 390.17 | 366.85 | 356.20 | 183.00 | 498.72 | 0.40 | 0.84 | 1.12 | 0.97 | 1.08 | 0.90 | 1.07 |
| 3nxu | 353.36 | 347.01 | 325.37 | 257.00 | 891.11 | 0.41 | 0.91 | 1.14 | 2.44 | 0.63 | 3.85 | 0.50 |
| 3ny8 | 391.20 | 396.17 | 372.22 | 215.00 | 514.50 | 0.48 | 0.89 | 1.18 | 1.18 | 0.99 | 1.19 | 0.94 |
| 3odu | 367.59 | 361.28 | 333.97 | 168.00 | 685.66 | 0.44 | 0.87 | 1.09 | 0.99 | 1.00 | 0.99 | 1.45 |
| 3pbl | 387.10 | 399.38 | 369.81 | 153.00 | 409.20 | 0.37 | 0.90 | 1.17 | 1.40 | 0.99 | 1.41 | 2.51 |
| 830c | 329.40 | 342.68 | 327.44 | 123.00 | 313.50 | 0.48 | 0.76 | 1.08 | 0.90 | 0.99 | 0.91 | 1.14 |

---
