# Supplementary material for: The scoring bias in reverse docking and the score normalization strategy to improve success rate of target fishing
Source: PubMed Central journal article supplement (PMC5308821; doi:10.1371/journal.pone.0171433), 2017-02-14
Supplement: pone.0171433.s004.pdf [file pone.0171433.s004.pdf]

**S3 Table. The ranks of all cocrystallized proteins of Astex Diverse Set before and after score normalization in the reverse docking by DOCK, Glide and AutoDock Vina.**

| Docking software | Protein | Raw score | Rank before score normalization | Normalized score | Rank after score normalization |
|------------------|---------|-----------|---------------------------------|------------------|--------------------------------|
| DOCK             | 1hnn    | -43.16    | 11                              | -1.21            | 2                              |
|                  | 1hp0    | -39.22    | 3                               | -0.14            | 8                              |
|                  | 1hq2    | -34.80    | 3                               | 0.68             | 16                             |
|                  | 1j3j    | -59.46    | 5                               | -1.91            | 9                              |
|                  | 1jla    | -54.47    | 1                               | -2.38            | 1                              |
|                  | 1ke5    | -40.62    | 8                               | -0.57            | 4                              |
|                  | 1l7f    | -45.34    | 5                               | -0.96            | 3                              |
|                  | 1lpz    | -69.99    | 2                               | -2.62            | 2                              |
|                  | 1m2z    | -56.44    | 1                               | -1.92            | 1                              |
|                  | 1n1m    | -41.96    | 11                              | -0.73            | 8                              |
|                  | 1of1    | -37.10    | 3                               | -0.03            | 5                              |
|                  | 1of6    | -34.26    | 16                              | -0.59            | 2                              |
|                  | 1q41    | -39.17    | 3                               | -0.06            | 5                              |
|                  | 1s19    | -35.67    | 13                              | -0.41            | 6                              |
|                  | 1sqn    | -40.77    | 1                               | -0.73            | 1                              |
|                  | 1t40    | -49.29    | 2                               | -2.00            | 1                              |
|                  | 1u1c    | -43.20    | 3                               | -0.75            | 4                              |
|                  | 1unl    | -49.19    | 1                               | -1.52            | 3                              |
|                  | 1v48    | -40.73    | 12                              | -0.72            | 8                              |
|                  | 1vcj    | -68.06    | 1                               | -3.02            | 1                              |
|                  | 1w2g    | -39.72    | 1                               | -0.15            | 5                              |
|                  | 1xoq    | -43.24    | 5                               | -0.27            | 10                             |
|                  | 1y6b    | -61.61    | 6                               | -3.26            | 2                              |
|                  | 1yqy    | -37.04    | 10                              | -0.01            | 12                             |
|                  | 1yv3    | -41.97    | 1                               | -0.54            | 2                              |
|                  | 2bsm    | -44.60    | 1                               | -0.84            | 1                              |
| Glide            | 1gkc    | -6.93     | 3                               | -0.73            | 2                              |
|                  | 1gpk    | -8.48     | 2                               | -1.40            | 3                              |
|                  | 1hnn    | -7.67     | 13                              | -1.25            | 7                              |
|                  | 1hp0    | -7.25     | 24                              | -0.52            | 21                             |
|                  | 1hq2    | -11.81    | 1                               | -3.00            | 1                              |
|                  | 1hwi    | -10.20    | 2                               | -4.94            | 1                              |
|                  | 1hww    | -7.56     | 2                               | -1.85            | 1                              |
|                  | 1ia1    | -8.01     | 6                               | -1.08            | 1                              |
|                  | 1ig3    | -7.42     | 15                              | -1.11            | 2                              |
|                  | 1j3j    | -7.92     | 5                               | -0.83            | 2                              |
|                  | 1jje    | -7.39     | 20                              | -2.26            | 1                              |
|                  | 1jla    | -13.05    | 1                               | -2.52            | 1                              |
|                  | 1k3u    | -12.53    | 1                               | -3.20            | 1                              |

|      |        |    |       |    |
|------|--------|----|-------|----|
| 1ke5 | -10.42 | 2  | -2.54 | 1  |
| 1l2s | -6.70  | 26 | -0.87 | 5  |
| 1l7f | -6.74  | 9  | -1.58 | 4  |
| 1lrh | -7.58  | 17 | -1.68 | 1  |
| 1m2z | -11.94 | 1  | -2.88 | 1  |
| 1mmv | -3.73  | 20 | 2.41  | 29 |
| 1n1m | -7.83  | 2  | -2.13 | 1  |
| 1n2j | -5.37  | 7  | 0.84  | 14 |
| 1n46 | -12.31 | 1  | -2.64 | 1  |
| 1nav | -11.60 | 2  | -2.18 | 2  |
| 1of1 | -10.89 | 1  | -2.81 | 1  |
| 1of6 | -10.31 | 1  | -2.09 | 1  |
| 1opk | -12.82 | 1  | -3.21 | 1  |
| 1owe | -8.48  | 8  | -2.24 | 1  |
| 1p62 | -10.05 | 1  | -2.89 | 1  |
| 1pmn | -11.00 | 1  | -2.57 | 2  |
| 1q1g | -8.11  | 7  | -0.65 | 15 |
| 1q41 | -11.01 | 1  | -2.78 | 1  |
| 1q4g | -10.96 | 1  | -2.86 | 1  |
| 1r1h | -11.12 | 1  | -3.41 | 2  |
| 1r55 | -7.80  | 1  | -2.31 | 1  |
| 1r9o | -7.89  | 13 | -0.80 | 14 |
| 1s19 | -13.25 | 1  | -3.34 | 1  |
| 1s3v | -9.30  | 2  | -1.76 | 1  |
| 1sj0 | -12.33 | 1  | -3.52 | 1  |
| 1sqn | -10.76 | 1  | -2.37 | 1  |
| 1t46 | -12.97 | 1  | -4.48 | 1  |
| 1t9b | -6.93  | 14 | -0.29 | 12 |
| 1tow | -8.62  | 4  | -2.00 | 1  |
| 1tt1 | -9.69  | 1  | -2.33 | 1  |
| 1tz8 | -8.73  | 6  | -2.01 | 1  |
| 1u1c | -8.40  | 2  | -1.99 | 1  |
| 1u4d | -10.08 | 1  | -2.95 | 1  |
| 1uml | -8.49  | 20 | -2.54 | 3  |
| 1unl | -9.22  | 4  | -1.91 | 2  |
| 1uou | -10.13 | 1  | -2.35 | 1  |
| 1v0p | -9.48  | 4  | -2.51 | 2  |
| 1v48 | -10.06 | 3  | -3.01 | 1  |
| 1v4s | -12.16 | 1  | -2.83 | 1  |
| 1vcj | -8.04  | 8  | -2.76 | 1  |
| 1w1p | -5.84  | 50 | -0.12 | 24 |
| 1w2g | -7.92  | 12 | -1.48 | 6  |
| 1x8x | -7.52  | 6  | -1.38 | 4  |
| 1xoq | -7.31  | 15 | -0.55 | 6  |
| 1y6b | -10.96 | 1  | -2.88 | 1  |

|          |      |        |    |       |    |
|----------|------|--------|----|-------|----|
|          | 1ygc | -7.97  | 7  | -1.83 | 1  |
|          | 1yv3 | -10.69 | 1  | -2.18 | 1  |
|          | 1yvf | -8.19  | 5  | -1.59 | 1  |
|          | 1ywr | -11.35 | 2  | -3.56 | 2  |
|          | 1z95 | -11.96 | 1  | -2.71 | 1  |
|          | 2br1 | -7.68  | 6  | -1.14 | 4  |
|          | 2bsm | -7.97  | 9  | -1.77 | 4  |
| <hr/>    |      |        |    |       |    |
|          | 1gkc | -6.60  | 21 | 1.37  | 39 |
|          | 1hnn | -8.90  | 1  | -0.75 | 2  |
|          | 1hp0 | -8.40  | 2  | 0.09  | 18 |
|          | 1hq2 | -9.20  | 1  | -3.38 | 1  |
|          | 1hwi | -9.20  | 6  | -1.88 | 1  |
|          | 1ig3 | -7.30  | 7  | 0.42  | 12 |
|          | 1jla | -11.60 | 1  | -2.19 | 1  |
|          | 1k3u | -10.00 | 1  | -1.43 | 2  |
|          | 1ke5 | -9.40  | 9  | -1.32 | 4  |
|          | 1l2s | -7.80  | 12 | -0.20 | 9  |
|          | 1lpz | -10.30 | 4  | -2.11 | 2  |
|          | 1lrh | -7.90  | 16 | -2.14 | 2  |
|          | 1m2z | -12.40 | 1  | -1.94 | 1  |
|          | 1n1m | -5.80  | 20 | 1.60  | 21 |
|          | 1n46 | -11.80 | 1  | -1.41 | 3  |
|          | 1nav | -10.30 | 2  | -1.05 | 4  |
|          | 1of1 | -8.50  | 4  | -1.12 | 1  |
|          | 1opk | -11.90 | 1  | -2.74 | 1  |
| AutoDock | 1oyt | -9.40  | 6  | -1.38 | 4  |
| Vina     | 1p62 | -7.80  | 3  | -1.28 | 1  |
|          | 1q1g | -9.10  | 1  | -1.15 | 1  |
|          | 1q4g | -9.30  | 6  | -1.29 | 1  |
|          | 1r1h | -9.70  | 3  | -1.99 | 1  |
|          | 1r55 | -6.60  | 35 | 0.11  | 13 |
|          | 1r9o | -8.70  | 12 | -0.19 | 23 |
|          | 1sqn | -11.60 | 1  | -1.29 | 3  |
|          | 1t40 | -11.00 | 1  | -1.62 | 2  |
|          | 1t46 | -13.40 | 1  | -3.91 | 1  |
|          | 1tow | -8.00  | 16 | -0.20 | 13 |
|          | 1uml | -10.30 | 3  | -1.51 | 6  |
|          | 1unl | -8.50  | 11 | -0.55 | 7  |
|          | 1v48 | -8.70  | 4  | -2.22 | 1  |
|          | 1vcj | -7.90  | 3  | -0.79 | 1  |
|          | 1w2g | -9.10  | 1  | -0.80 | 1  |
|          | 1x8x | -6.80  | 14 | 1.32  | 29 |
|          | 1xm6 | -8.80  | 1  | -0.27 | 5  |
|          | 1xoq | -9.50  | 2  | -0.67 | 4  |
|          | 1xoz | -12.50 | 1  | -2.48 | 1  |

|      |        |    |       |    |
|------|--------|----|-------|----|
| 1y6b | -9.40  | 20 | -1.49 | 12 |
| 1ygc | -9.60  | 3  | -2.36 | 1  |
| 1yqy | -9.90  | 2  | -1.67 | 1  |
| 1yvf | -9.00  | 14 | -1.42 | 2  |
| 1ywr | -10.60 | 5  | -1.99 | 3  |
| 1z95 | -10.60 | 3  | -1.90 | 3  |
| 2bsm | -9.30  | 2  | -1.84 | 1  |

---
